# Supplementary material for: Mass Spectrometric Blood Metabogram: Acquisition, Characterization, and Prospects for Application
Source: MDPI journal article supplement (doi:10.3390/ijms24021736), 2023-01-15
Supplement: s1 [file s1]

# Supplementary Materials

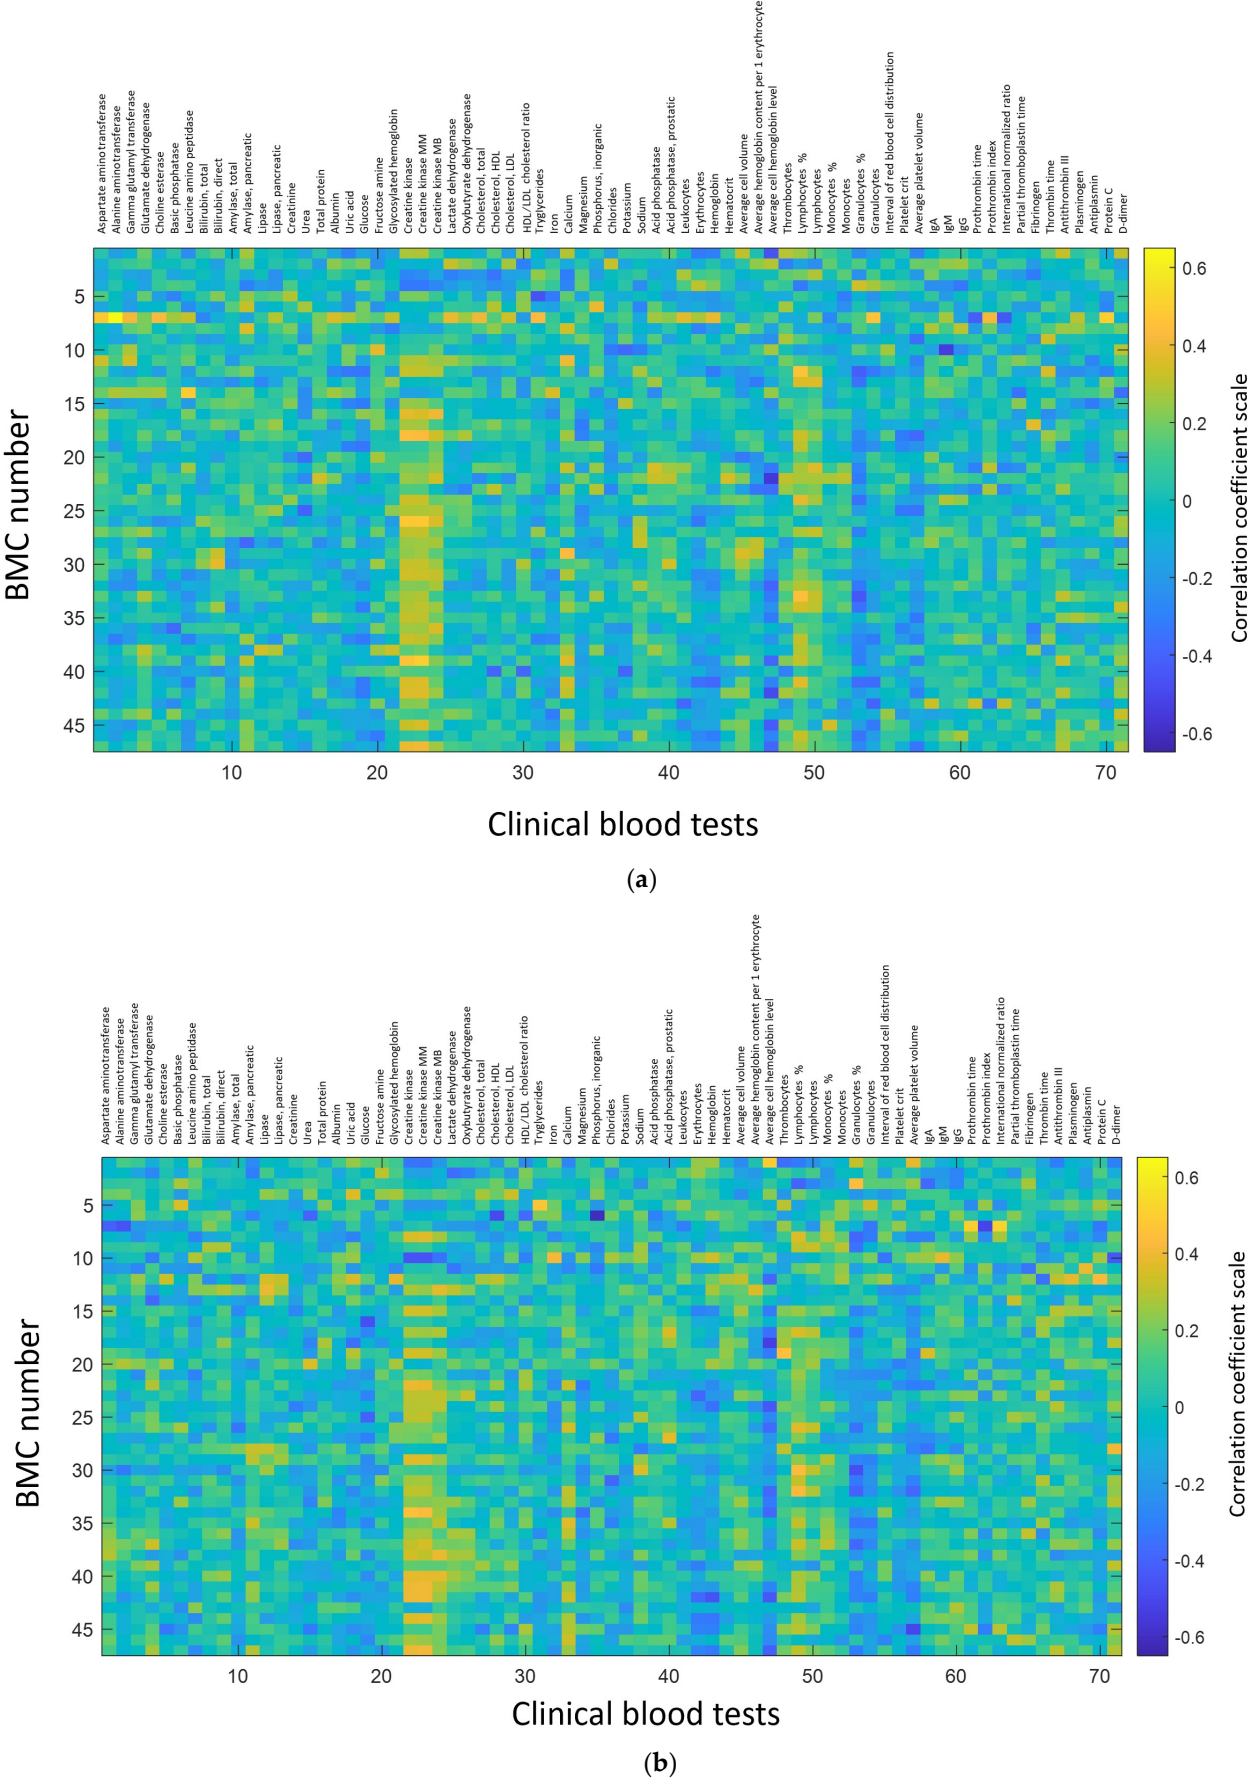

**Figure S1.** Correlation of the blood metabolome components (BMCs) with the clinical blood tests. **(a)** Data for the BMCs corresponded to the highest positive coefficients (loadings) of the principal components. **(b)** Data for the BMCs corresponded to the lowest negative coefficients (loadings) of the principal components.
