# Supplementary material for: Mass Spectrometric Blood Metabogram: Acquisition, Characterization, and Prospects for Application
Source: Int J Mol Sci. 2023 Jan 15;24(2):1736. doi: 10.3390/ijms24021736 (PMC9861083; doi:10.3390/ijms24021736)
Supplement: Supplementary file 1 [file ijms-24-01736-s001.zip › Supplementary Materials.xlsx]

## Sheet: Table S1
	Table S1. Clinical test results for human blood samples.
	Sample ID		1	2	3	4	5	6	7	8	9	10	11	12	13	14	15	16	17	18	19	20	21	22	23	24	25	26	27	28	29	30	31	32	33	34	35	36	37	38	39	40	41	42	43	44	45	46	47
	Age		33	33	27	24	24	21	28	31	21	25	29	28	34	22	25	26	23	25	23	23	25	22	23	23	27	30	24	23	23	23	23	36	21	22	22	22	20	24	24	27	22	20	23	20	20	32	27
	Biochemistry	Reference levels
	Aspartate aminotransferase	0-37 IU/L	37.9	33.6	35.8	31.6	30.5	47.5	25.4	24.5	27.4	21.1	18	31.6	26.7	24.6	26	69	19.6	24.5	18.3	47	22.4	107	22.7	36.8	53.6	22.1	39.1	31.6	31.7	27.8	19.8	27.9	18	23.8	26	34.3	23.8	16.4	23.9	35.4	27.9	33.5	34.6	22.1	19	25.6	15.1
	Alanine aminotransferase	0-42 IU/L	20	41.9	59.5	28.6	17.8	23.4	15.6	22.4	26	19.3	10.9	31.3	20.4	16.1	13.7	71	19.7	19	9.5	45.5	22.6	57.2	10.7	22.2	51.1	14.4	19.5	24.5	31.4	35.7	9.7	29.6	9.9	14.1	24.2	20.4	19.7	9.9	18.9	25.1	37.1	29.9	41.2	18.7	15.8	27.9	11.1
	Gamma-glutamyl transferase	11-50 IU/L	58.2	47.9	56	19.7	15.4	17.5	19.6	32.2	21.7	14.3	15.9	12.8	11.5	22.3	26.4	170	20.1	30.7	14.1	20.7	24.6	60.5	12.3	18.2	45	23.3	16.5	25	26.6	48.7	23	27.7	15.5	15.2	12.7	19.7	18.3	16.6	20	13.1	21.9	15.9	50	14.3	12.9	20.4	11.8
	Glutamate dehydrogenase	0-7 IU/L	3.29	7.93	19.1	2.77	4.77	8.48	5.06	6.84	6.37	3.74	4.45	4.84	5.53	4.84	7.63	17.4	4.53	4.75	4.45	7.36	7.54	54.1	3.37	5.09	4.54	5.56	5.97	3.27	4.1	4.72	5.24	5.07	4.06	6.85	4.01	3.6	3.79	3.24	3.12	3.48	9.38	1.49	2.33	2.63	3.8	6.27	4.94
	Choline esterase	5300-12900 IU/L	8368	8895	9823	9152	6230	8688	7442	8119	10484	8933	8328	7413	8246	8880	8452	12001	9925	8678	9316	10272	8728	13593	6766	7743	8406	8324	8777	7986	8402	8770	6913	10708	8316	9049	9166	7646	8879	7094	9770	7941	8194	8546	10872	8667	7291	9431	8512
	Basic phosphatase	80-306 IU/L	160	241	184	201	149	238	168	199	158	191	164	236	151	228	102	258	234	149	132	183	137	230	158	165	217	173	265	162	159	215	141	162	191	157	197	132	161	109	198	154	155	164	196	180	201	229	171
	Leucine amino peptidase	21.0-57.6 IU/L	41.3	40.2	46.5	33.4	32.1	36.7	33	40.1	33.4	29.4	30.7	31.2	31.1	39.1	32.8	46.6	45	33.4	32	39.7	31.7	36.7	34.7	25.3	31.3	32.4	28.2	39	37.4	45.2	47.1	36.2	31.3	33.9	31.8	34.6	38.4	27.4	36.5	40.1	36.1	36.1	43.2	27.6	31.5	29.4	28
	Bilirubin, total	0-17.1 μM	14.2	8.87	8.11	23.5	12.3	8.61	8.63	11.7	8.74	35.4	9.52	10.1	7.44	9.49	19.8	9.08	6	8.97	8.59	26.9	17.7	5.78	8.9	4.48	19	14.9	9.87	21.8	11.6	16.9	30.6	11	12.3	14.3	14.2	7.96	10.1	12.2	15.2	17.1	37.1	5.31	5.39	11.8	15.1	7.05	4.72
	Bilirubin, direct	0-4.30 μM	4.29	2.21	3.85	8.85	2.59	3.46	3.65	1.28	3.69	8.11	2.64	4.06	2.02	2.34	6.82	6.9	1.94	3.79	4.11	9.85	6.82	1.39	2.71	2.41	4.88	4.08	3	5.79	2.12	4.22	7.87	2.93	2.35	4.14	3.68	2.01	2.99	3.09	4.11	3.35	7.02	2.92	2.88	3.93	4.21	1.36	1.55
	Amylase, total	0-220 IU/L	78.4	62.9	102.3	79.6	56.9	61.1	84.2	70.6	64.4	114.5	88.8	70.1	83.8	50.5	74.3	45.5	101	74.5	85.4	49.9	59.8	51.2	63.9	51.8	40	114.3	66.3	104.4	61.3	66.6	63.8	72.4	64.9	76.3	76.6	125	83	61.2	58.3	97.1	85.5	71.7	67.9	53.3	86.1	55.5	80.7
	Amylase, pancreatic	0-115 IU/L	16	45.4	30.3	41.5	38	32.4	35.8	33.1	38.1	55.8	37	40.1	40	32.1	24.7	23.4	48.8	34.2	40.6	20.1	20.7	36.4	20.9	26	26.4	42.1	37.6	71.9	40.4	30.6	34	29.1	24.8	30.8	25.6	90.9	31.6	14.4	32.9	36.6	24.4	19	20.6	23.6	23.7	21.9	19.3
	Lipase	0-190 IU/L	139	118	92.8	59.8	71.5	120	52.6	95.5	61.1	125	118	67.5	104	64.6	99.8	71.8	89.9	112	106	81.8	115	136	73.5	78.9	70.2	69.3	105	61.9	73.1	109	75.9	133	75.5	59.8	56.7	214	114	71.5	79.1	151	99.9	59.9	108	74.4	105	65.1	74.1
	Lipase, pancreatic	0-60 IU/L	52.3	53.7	45.2	31.3	32.1	58.7	31.5	43.7	41.8	45.7	42.2	43	44.9	27.7	47.4	53.4	41.4	46.6	51.5	35.9	53.2	49.8	29.1	30.3	40.5	30.5	36.8	24.1	29.4	55.1	29.1	48.6	24.5	21.5	31	76.1	49	21.7	32.5	47.7	38.1	24.8	41	27.3	36.1	24.9	32.8
	Creatinine	53-115 μM	89.9	97.9	100.4	94.6	82.8	90.6	115	89.8	66.1	79.8	79.9	115	91.2	72.1	81.9	113	101	99.7	94.9	92.1	87.4	79.5	71	90	78.8	89	91.4	86.2	95.4	113	97.4	78.4	101	99.9	95.6	94.4	64.9	68.2	108	79.2	87.1	94.9	74.1	94.4	70.1	102	87.5
	Urea	1.7-8.3 mM	4.06	3.92	7.01	5.36	5.79	8.21	5.13	2.82	4.93	6.97	4.36	3.73	3.78	4.47	2.47	3.39	5.54	5.66	4.82	3.3	7.2	5.52	5.84	4.82	5.62	5.06	5.86	4.45	6.51	4.4	4.78	3.79	4.63	3.28	6.75	4.99	3.29	4.52	6.29	3.11	5.14	6.63	3.24	4.27	3.61	4.89	6.22
	Total protein	67-87 g/l	69.6	77.7	74.3	78	72.3	77.9	77.8	74.6	81.2	74.5	81.3	75.2	75.5	81.1	80	79.8	76.4	75.6	68.6	69.6	70.2	82.2	70.6	71.2	73.8	77.9	69.8	75.5	73.6	79.1	72.8	79.5	73.3	76.7	75.1	75.7	83.3	74.3	76.7	71.6	73.4	78.3	85.1	76.7	71.2	69.4	72.5
	Albumin	35-50 g/l	46.9	50.7	45.1	48.9	45.2	47.9	44.9	42.7	47.2	45.8	47.6	48.6	46.2	47.7	46.3	48	49.8	49.8	48.4	48.8	47.6	51.2	44.9	44.3	45.7	48.9	45.9	47.6	45.6	48.5	47	45.4	50	49.6	46.7	48.5	50	47.7	44.2	45.3	47.4	46.4	49.9	45.6	46	44.5	48.3
	Uric acid	200-420 μM	411	347	491	356	413	283	256	348	350	389	248	228	202	284	236	401	323	355	260	431	504	529	252	327	394	321	235	385	459	410	342	418	374	265	268	355	420	338	288	281	246	310	409	367	281	348	252
	Glucose	4.2-6.4 mM	5.6	4.76	5.43	4.28	4.88	5.28	4.82	5.53	6.13	6.13	5.39	6.04	5.67	5.6	5.36	6.04	5.32	5.42	4.75	5.01	6.44	5.97	4.24	4.76	4.43	5.11	4.59	5.62	4.8	5.52	4.96	5.08	4.89	5.39	5.04	5.77	5.54	5.8	4.84	5.3	4.9	5.3	5.47	4.96	5.34	5.72	5.5
	Fructose amine	0-285 μM	243	261	261	269	255	241	240	233	251	239	231	238	218	231	248	218	184	224	225	251	281	207	217	215	239	234	219	82	215	229	248	231	230	242	222	239	246	214	249	257	253	242	242	241	236	247	234
	Glycosylated hemoglobin	4.5-7.5 %	6.06	6.4	6.16	5.25	5.54	5.59	5.18	5.69	6.18	5.54	5.81	5.56	7.05	6.24	6.07	6.29	5.65	5.38	5.8	5.88	6.23	6.14	6.15	6.3	5.16	4.92	6	4.64	5.92	5.56	5.14	7.37	5.81	5.44	5.89	5.48	5.82	5.59	6.06	5.51	5.65	5.82	6.07	6.14	6	7.31	7.15
	Creatine kinase	0-190 IU/L	445	113	137	134	185	853	190	79	135	187	136	167	161	107	187	78.1	121	119	137	851	161	103	132	189	188	125	472	184	140	121	110	61.6	74.6	111	93.8	729	348	73.1	189	134	110	142	111	180	101	177	86.8
	Creatine kinase MM	0-190 IU/L	414.4	92.4	121.4	115.8	161.5	800.8	169.4	65.9	144.4	167.3	119.4	145	142.1	91.4	164.1	63.1	104.4	101.6	120	819.5	150.5	86.5	108.9	165.4	167.4	106.4	433.1	161.1	119.9	104	93.9	46.8	60.5	98.2	75.8	692.7	319.9	58.3	165.8	113.3	92.9	119.2	88.8	162.2	81.1	155.1	71.6
	Creatine kinase MB	0-24 IU/L	30.6	20.6	15.6	18.2	23.5	52.2	20.6	13.1	20.6	19.7	16.6	22	18.9	15.6	22.9	15	16.6	17.4	17	31.5	10.5	16.5	23.1	23.6	20.6	18.6	38.8	22.9	20.1	17	16.1	14.8	14.1	12.8	18	36.3	28.1	14.8	23.2	20.7	17.1	22.8	22.2	17.8	19.9	21.9	15.2
	Lactate dehydrogenase	225-450 IU/L	395	330	291	357	248	256	348	344	264	322	256	281	287	275	260	360	280	307	311	384	286	455	307	314	352	327	444	370	329	370	244	298	243	274	316	383	321	236	313	291	266	269	278	245	248	340	246
	Oxybutyrate dehydrogenase	72-182 IU/L	168	138	134	160	120	135	155	146	121	153	120	131	141	115	126	152	130	136	138	165	133	161	113	138	144	141	192	154	161	156	111	134	102	138	143	159	148	101	165	138	116	113	131	104	112	162	90.3
	Cholesterol, total	2.8-5.2 mM	6.68	5.09	5.89	4.36	4.87	3.5	3.27	5.11	5.1	5.2	4.71	3.85	5.17	4.19	4.22	6.57	4.79	4.28	5.09	4.25	5.2	4.79	4.18	3.12	5.11	5.03	4.19	5.02	5.4	5.14	3.66	4.84	4.99	3	5.07	4.56	4.87	3.78	3.18	3.69	3.99	4.2	4.81	3.71	3.05	4.62	4.34
	Cholesterol, HDL	>0.91 mM	2.44	1.59	2.02	1.68	2	1.73	1.17	1.73	1.67	2.03	1.99	1.73	1.68	1.41	1.81	2.17	1.87	2.05	2.11	1.65	1.71	1.81	1.89	1.64	1.53	1.42	1.21	1.59	1.64	1.44	1.12	1.36	1.31	1.02	1.56	1.29	1.44	1.12	1.4	1.57	1.26	1.45	1.25	1.19	1.17	1.25	1.28
	Cholesterol, LDL	<4.0 mM	4	3.2	2.92	2.41	2.48	1.55	1.83	2.98	2.72	2.91	2.32	1.81	3.22	2.44	2.02	3.48	2.4	1.94	2.63	1.98	3.05	2.35	1.99	1.2	2.9	2.93	2.66	3.17	3.57	3.29	2.26	2.79	3.1	1.72	3.18	3.04	3	2.31	1.52	1.6	2.3	2.21	2.62	2.27	1.52	2.4	2.69
	HDL/LDL cholesterol ratio	>0.28	0.61	0.5	0.69	0.7	0.81	1.12	0.64	0.58	0.61	0.7	0.86	0.95	0.52	0.58	0.9	0.62	0.78	1.06	0.8	0.83	0.56	0.77	0.95	1.37	0.53	0.48	0.45	0.5	0.46	0.44	0.49	0.49	0.42	0.59	0.49	0.42	0.48	0.48	0.92	0.98	0.55	0.66	0.48	0.52	0.77	0.52	0.47
	Triglycerides	0.55-2.30 mM	0.53	0.65	2.09	0.59	0.87	0.48	0.6	0.88	1.57	0.58	0.88	0.68	0.59	0.75	0.86	2.03	1.14	0.63	0.78	1.36	0.96	1.38	0.67	0.63	1.49	1.5	0.71	0.56	0.41	0.91	0.62	1.52	1.28	0.59	0.74	0.5	0.96	0.77	0.56	1.14	0.95	1.18	2.06	0.56	0.78	2.13	0.82
	Iron	6.6-26.0 μM	17.1	16.9	21.8	30	10.5	10	7.95	22.4	20.6	15.2	9.9	9.37	7.97	10.2	16.1	25.3	16.6	9.97	13.4	39.7	19.8	8.09	17.4	7.98	23.6	15.8	18.8	20.1	15.8	21.5	16.7	25.6	25.3	22.5	19.4	16.9	13.3	25.2	20.1	19.3	11	10	10.9	20	20.2	14.4	10.1
	Calcium	2.25-2.67 mM	2.55	2.63	2.56	2.4	2.6	2.54	2.41	2.4	2.64	2.48	2.55	2.62	2.5	2.59	2.62	2.7	2.31	2.53	2.36	2.37	2.4	2.61	2.52	2.38	2.49	2.66	2.63	2.59	2.46	2.55	2.67	2.43	2.35	2.39	2.33	2.49	2.32	2.34	2.55	2.51	2.33	2.32	2.34	2.57	2.3	2.29	2.41
	Magnesium	0.7-1.05 mM	0.71	1.02	0.91	1.01	0.97	0.9	1.04	0.98	1.01	0.87	0.99	1.03	0.94	1	0.91	1.13	1.04	1.01	0.94	1.02	0.98	1.11	1.04	0.93	1.04	0.96	0.95	0.99	0.89	1.03	1.01	0.95	1.04	1	0.98	0.95	0.94	0.96	0.94	0.98	1.1	1.04	1.03	1	1.04	0.89	1.01
	Phosphorus, inorganic	0.87-1.45 mM	1.38	1.12	1.36	1.04	1.42	1.32	1.37	1.39	1.43	1.39	1.22	1.19	1.3	1.34	1.15	0.92	1.22	1.15	1.25	1.04	1.1	1.74	1.33	1.26	1.06	0.98	1.14	0.92	1.12	1.07	0.87	1.06	1.2	0.97	1.2	1.38	0.88	0.88	1.44	1.1	1.38	1.38	1.09	1.14	1.02	0.91	1.36
	Chlorides	98-106 mM	98.8	99.8	103.5	103.5	100	98.7	102	99.5	99.7	105	99.7	103	103	100	102	104	105	101	106	105	111	110	103	105	105	105	108	106	103	106	103	103	104	105	106	107	105	106	101	98.5	102	103	106	103	104	103	105
	Potassium	3.5-5.1 mM	4.17	4.13	4.01	4.27	3.57	3.45	3.78	3.75	3.82	3.84	3.87	4.35	3.84	3.88	3.91	4.4	3.97	4.7	4.02	3.56	4.08	3.95	3.91	4.42	4.32	4.18	3.8	3.84	3.57	3.7	3.75	3.87	4.14	4.04	4.21	3.71	4.22	3.78	3.76	4.32	3.86	4.1	3.94	4.18	3.96	3.71	3.88
	Sodium	135-145 mM	136.3	138	141.7	138.1	138.2	139	142.2	135.3	136.4	138.2	139.1	135.6	138.2	137.8	138.4	136.1	139.3	136.5	138.9	138.3	137.7	139.2	142	144.8	139.6	144.4	144.1	143.8	143.6	141.3	140.5	141.4	142.5	141.6	142.2	140.8	142.3	141.5	138.8	137.2	141.2	140.3	141.4	141.5	136.7	137.7	138.1
	Acid phosphatase	0-5.4 IU/L	4.09	3.07	3.15	2.08	3.09	3.81	3.4	3.23	3.4	2.03	2.74	4.35	2.9	3.43	2.42	2.91	3.37	2.74	2.8	2.52	2.51	3.37	3.79	2.93	2.53	3.48	3.62	2.13	3.13	2.46	2.05	3.13	2.98	2.82	2.87	3.24	2.84	2.6	3.28	1.88	2.63	3.62	3.65	3.41	1.81	2.96	3.07
	Acid phosphatase, prostatic	0-1.7 IU/L	1.02	1.52	0.89	0.86	0.81	1	0.65	0.93	1.03	0.47	0.62	1.55	0.56	0.89	0.48	0.73	1.29	0.72	0.84	1.12	0.54	0.68	1.35	1.3	0.98	1.38	0.73	1.04	0.72	0.62	0.82	0.93	1.2	0.62	0.56	0.43	0.55	0.78	1.32	0.48	0.98	1.33	1.02	0.89	1.15	0.46	0.63
	Hematology	Reference levels
	Leukocytes	4.0-10.0 x109/L	6	4.9	6.7	5.5	5.3	6.6	5.2	5.3	7.3	4.3	7.2	6.5	6.3	3.4	4.7	9.1	6.4	7	7.1	5.1	4.7	6.9	5.3	6.5	6	5.2	6	6.1	4.6	7.6	5.4	8.4	8.6	5.9	4.8	6.7	5.4	4.9	5.4	5.2	6.7	8.2	10.6	7.6	7.7	7.4	5
	Erythrocytes	4.0-5.7 x1012/L	5.03	5.31	5.85	5.53	5.16	4.94	5.13	5.09	5.01	4.91	5.01	5.22	5.24	5.78	4.8	5.45	5.45	5.41	5.02	4.98	5.38	5.17	4.9	4.94	4.7	5.04	5.01	5.38	5.16	5.46	4.99	5.08	5.7	5.26	5.48	4.94	5.6	4.8	5.23	5.09	5.6	5.92	6.25	6.87	4.67	5.7	5.1
	Hemoglobin	130-173 g/L	171	162	165	164	152	153	153	155	147	152	143	158	147	152	156	169	168	179	148	166	171	154	155	143	154	161	156	165	163	172	155	157	171	157	166	148	165	150	161	159	175	164	176	170	155	162	154
	Hematocrit	34.0-49.0 %	44.5	43.2	44.4	43.6	43.5	45.3	45.9	44.3	43.3	43.7	43.3	47.1	43.5	46	45.4	49.2	49.8	52.5	43.9	48.4	48.5	45.6	44.6	41.3	43.7	44.6	44.8	47.6	46	49.2	44.7	45.7	49.9	44.8	47.5	42.6	48.1	42.4	46.4	44.7	48.5	49.8	55.4	60	43	43	41.1
	Average cell volume	80.0-100.0	88.5	81.4	75.9	78.8	84.3	91.7	89.5	87	86.4	89	86.4	90.2	83	79.6	94.6	90.3	91.4	97	87.5	97.2	90.1	88.6	91.4	83.6	93	88.5	89.4	88.5	89.1	90.1	89.6	90	87.5	85.2	86.7	86.2	85.9	88.3	88.7	87.8	86.6	84.1	88.6	87.3	92.1	81.6	80.6
	Average hemoglobin content per 1 erythrocyte	27.0-35.0 pg	34	30.5	28.2	29.7	29.5	31	29.8	30.5	29.3	31	28.5	30.3	28.1	26.3	32.5	31	30.8	33.1	29.5	33.3	31.8	29.8	31.6	28.9	32.8	31.9	31.1	30.7	31.6	31.5	31.1	30.9	30	29.8	30.3	30	29.5	31.1	30.8	31.2	31.3	27.7	28.2	24.7	33.2	30.7	30.2
	Average cell hemoglobin level	300-380 g/L	384	375	372	376	349	336	333	350	339	346	330	335	336	330	344	343	337	341	337	343	353	336	346	346	352	361	348	347	354	350	347	344	343	350	349	347	343	354	347	356	361	329	318	283	360	377	375
	Thrombocytes	100-400 x109/L	171	195	240	254	246	198	250	240	317	257	317	223	200	232	211	321	261	303	259	238	189	315	204	307	254	210	215	271	173	175	199	212	220	223	206	242	238	167	295	233	235	309	314	388	244	196	178
	Lymphocytes	19.0-45.0 %	22.5	33.3	35.4	26.1	40	48.2	33.2	28	43.4	37.5	21.8	33.8	39.1	47.4	32.9	21.8	29.7	23.7	46.8	39.3	31.2	40.5	36.4	42.4	40.4	40.6	33.7	31	26.5	36.7	38	45.3	41.4	37.2	29.3	44	21	21.9	44.8	44.7	41.7	29.8	35.5	44.4	19.4	44.2	39.8
	Lymphocytes	1.2-4.0 x109/L	1.4	1.6	2.4	1.4	2.1	3.2	1.7	1.5	3.2	1.6	1.6	2.2	2.6	1.6	1.5	2	1.9	1.7	3.3	2	1.5	2.8	1.9	2.8	2.4	2.1	2	1.9	1.2	2.8	2.1	3.8	3.6	2.2	1.4	3	1.1	1.1	2.5	2.3	2.8	2.4	3.8	3.4	1.5	3.3	2
	Monocytes	3.0-11.0 %	4.4	3.8	7.5	3	6.2	8.6	7.8	7.2	8.7	9.6	4.5	7.4	5	9.2	8.7	6.3	9.4	3.5	9.8	7.8	9.9	7.4	6.8	6.6	8	3.8	7.6	9.8	9.9	6.9	7.3	7.3	7.1	5.6	8.3	8.1	11	9.5	5.9	9.7	7	6.2	9.9	7.1	7	5.7	6.4
	Monocytes	0.09-0.60 x109/L	0.3	0.2	0.5	0.2	0.3	0.6	0.4	0.4	0.6	0.4	0.3	0.5	0.3	0.3	0.4	0.6	0.6	0.2	0.7	0.4	0.5	0.5	0.4	0.4	0.5	0.2	0.5	0.6	0.5	0.5	0.4	0.6	0.6	0.3	0.4	0.5	0.6	0.5	0.4	0.5	0.5	0.5	1.1	0.6	0.6	0.5	0.3
	Granulocytes	42.0-85.0 %	73.1	62.9	57.1	70.9	53.8	43.2	59	64.8	47.9	52.9	73.7	58.8	55.9	43.4	58.4	71.9	60.9	72.8	43.4	52.9	58.9	52.1	56.8	51	51.6	55.6	58.7	59.2	63.6	56.4	54.7	47.4	51.5	57.2	62.4	47.9	68	68.6	49.3	45.6	51.3	64	54.6	48.5	73.6	50.1	53.8
	Granulocytes	2.0-5.8 x109/L	4.3	3.1	3.8	3.9	2.9	2.8	3.1	3.4	3.5	2.3	5.3	3.6	3.5	1.5	2.8	6.5	3.9	5.1	3.1	2.7	2.7	3.6	3	3.3	3.1	2.9	3.5	3.6	2.9	4.3	2.9	4	4.4	3.4	3	3.2	3.7	3.2	2.5	2.4	3.4	5.3	5.7	3.6	5.6	3.6	2.7
	Interval of red blood cell distribution	11.5-14.5 %	13.7	12.4	13.8	13.5	13.7	14	13.6	14.5	13.7	14.2	13.4	13.4	13.7	14.7	13.2	13.2	14	13.9	14.3	13.9	13.3	13.9	12.9	13	13.7	12.7	13.6	14	13.7	13.9	13.9	13.3	12.8	13.2	13.4	13.3	13.7	12.8	13.6	13.3	13.3	13.7	14	15.5	13.5	15.8	13.7
	Platelet crit	0.08-1.00 %	0.14	0.12	0.18	0.22	0.12	0.17	0.18	0.17	0.2	0.17	0.17	0.16	0.12	0.13	0.12	0.17	0.18	0.13	0.13	0.13	0.15	0.21	0.14	0.15	0.17	0.12	0.17	0.18	0.15	0.11	0.2	0.18	0.18	0.21	0.14	0.12	0.17	0.13	0.13	0.12	0.14	0.17	0.23	0.25	0.14	0.11	0.15
	Average platelet volume	6.0-11.0 fL	8.3	6.4	7.5	8.8	6	8.9	7.4	7.4	6.4	6.9	5.4	7.2	6	4.8	5.8	5.5	7.1	4.3	5.1	5.6	8	6.8	7	5.1	6.7	6	8.1	6.7	8.7	6.7	10.1	8.7	8.2	9.7	6.5	5.3	7.2	8.3	4.5	5.3	6.3	5.6	7.4	6.7	6	6	8.6
	Immunology	Reference levels
	IgA	0.70-4.00 g/L	2.07	1.96	2.53	3.17	2.27	2.18	1.42	2.15	2.94	0.91	1.55	2.5	0.79	1.11	3.04	1.78	1.25	1.69	0.8	2.72	1.29	1.89	1.53	3.79	3.94	2.84	2.65	2.88	2.94	5.32	2.82	3.76	4.31	4.6	3.16	3.26	4.24	2.7	1.28	2.36	1.19	2	2.07	2.18	1.36	1.7	1.65
	IgM	0.40-2.30 g/L	0.94	1.14	1.3	1.06	0.82	0.66	1	0.87	1.53	0.67	1.03	1.18	1.07	1.3	0.95	3.13	2.15	0.73	1.15	1.14	1.56	1.29	1.69	1.16	1.72	2.05	1.37	1.95	2.15	1.54	1.13	1.7	1.62	1.17	1.37	2.14	1.14	1	1.03	0.89	0.72	1.18	1.28	1	0.82	0.97	0.56
	IgG	7.0-16.00 g/L	8.14	10.6	9.03	10.27	11.28	13.28	12.97	10.58	9.79	7.81	14.09	7.08	8.75	11.63	15.51	8.33	12.32	11.92	11.41	9.97	8.55	12.15	17.44	15.4	17.48	17.95	11.87	16.46	15.31	20.33	13.11	20.23	16.66	18.92	16.72	15.99	14.22	15.06	10.18	8.7	8.66	9.04	9.76	8.61	10.52	10.36	8.11
	Hemostasis	Reference levels
	Prothrombin time (CT)	9.8-12.7 sec	11.2	11.3	10.7	12.9	10.5	12	12.9	11.6	10.8	11.5	10.7	11.3	11	11.8	12.2	10.6	10.6	11	11.3	12.2	11.8	11.9	12	11.8	11.2	11.4	11.3	12.2	11.6	11	12.4	10.5	11.4	11.8	11.7	11.6	11.3	11.5	11.7	12.2	10.6	11.7	11.1	12	11.7	11.3	11.7
	Prothrombin index	70-130 %	111	109	123	81.4	128	95.4	81.4	103	120	105	123	109	116	99	92	125	118	116	109	92	99	97.2	95.4	99	111	107	109	92	103	116	88.8	128	107	99	101	103	109	105	101	92	125	101	113	95.4	101	109	101
	International normalized ratio	0.85-1.15 units	0.99	1	0.95	1.14	0.93	1.06	1.14	1.03	0.96	1.02	0.95	1	0.97	1.07	1.08	0.94	0.96	0.97	1	1.08	1.04	1.05	1.06	1.04	0.99	1.01	1	1.08	1.03	0.97	1.1	0.93	1.01	1.04	1.04	1.03	1	1.02	1.04	1.08	0.94	1.04	0.98	1.06	1.04	1	1.04
	Partial thromboplastin time	26.4-37.5 sec	40.7	41.6	38.8	38.6	38.8	37.1	50.2	37	36.1	33.9	39.7	38.5	34.9	38	30.6	34	35	42.3	40.5	45	48.8	42.5	38.8	44	43	39.6	38.1	41.1	37.5	38.4	39	37.1	38.7	37.4	41.8	33.7	39.5	39.5	36	37.3	33.2	39.2	39	43	36.8	36.6	37
	Fibrinogen	1.8-3.5 g/L	2.54	1.89	2.37	2	1.96	2	2.06	2.13	1.15	1.88	2.58	1.81	1.75	2.13	1.99	2.23	1.88	1.83	1.83	1.76	2.04	2.33	1.89	1.81	1.86	1.99	1.98	1.71	2.21	2.11	1.95	2.11	1.74	1.74	1.79	1.87	2.03	1.9	1.79	1.63	1.9	1.79	2.31	1.93	1.62	1.38	1.85
	Thrombin time	14-21 sec	17.8	21.2	19.1	19.8	20.8	19.5	19.8	20.1	20.4	18.9	19.4	19.7	20.3	19.8	19.8	18.4	19.4	20.1	19.8	19.5	18.9	19.4	20.2	19.1	21.7	20.2	19.8	21.1	18.6	18.2	19.6	19.5	20.1	20.3	19.8	19.4	18.9	19.6	20.9	20.2	19.7	20.1	18.3	17.9	19.4	21.3	17.9
	Antithrombin III	75-125 %	95	89.9	119	85.7	108	109	100	104	109	111	116	108	122	109	91.6	129	119	112	110	115	109	127	91.6	103	90.8	111	104	89.9	98.4	101	90.8	101	104	101	88.2	97.5	125	108	90.8	91.6	97.5	86.5	100	97.5	100	76.3	92.5
	Plasminogen	75-150 %	108	100	96.7	72.9	114	79.6	88.2	102	113	102	125	83	112	104	101	148	104	119	96.7	104	115	133	87.4	85.7	118	114	93.3	84	110	122	85.7	133	98.4	104	86.5	98.4	121	112	96.7	80.4	99.2	96.7	130	94.2	73.5	66.5	96.7
	Antiplasmin	80-120 %					120	121	115	118	124	135	120	118	129	126	90.8	138	124	144	120	126	122	127	112	115	115	121	120	130	130	128	114	131	117	130	120	115	132	130	120	110	127	115	125	108	115	108	123
	Protein С	70-140 %	107	138	120	85.7	119	104	74	96.7	121	112	113	95	113	97.5	85.7	223	159	106	103	115	117	120	104	95.8	108	108	128	78.3	108	123	87.4	154	122	122	91.6	100	115	109	81.6	85.7	104	127	123	108	118	120	101
	D-dimer	Up to 550 μg/L	226	309	107	102	392	448	377	602	534	293	664	174	241	291	379	726	213	297	243	322	583	287	126	154	379	305	592	225	178	368	237	121	<99	114	184	193	<99	227	303	123	481	362	419	257	319	355	123
[truncated: 1 more columns]
